# Supplementary material for: Current Uses of Mushrooms in Cancer Treatment and Their Anticancer Mechanisms
Source: MDPI journal article supplement (doi:10.3390/ijms231810502), 2022-09-10
Supplement: s1 [file s1]

Supplementary Data—Table S1

| Mushroom                   | Cancer                         | Phase          | Study Status | Active Compound/s            | Identifier  | Investigator      |
|----------------------------|--------------------------------|----------------|--------------|------------------------------|-------------|-------------------|
| <i>Trametes versicolor</i> | Breast cancer                  | Phase 4        | Ongoing      | Krestin, PSK, PSP            | NCT00647075 | Pere Gascon       |
| <i>Ganoderma lucidum</i>   | Breast cancer, quality of life | Phases 1 and 2 | Ongoing      | Polysaccharide peptides      | NCT02486796 | Christina Shannon |
| <i>Grifola frondosa</i>    | Lung neoplasms                 | Phase 1        | Ongoing      | Grifolan, Maitake D Fraction | NCT02603016 | Shunchang Jiao    |
| <i>Grifola frondosa</i>    | Breast carcinoma               | Phase 2        | Ongoing      | Grifolan, Maitake D Fraction | NCT02603016 | Shunchang Jiao    |
